# Supplementary material for: Macrocyclic host appended carbon nanotubes for selective adsorption of metal ions: combined experimental, DFT and MD studies
Source: Royal Society of Chemistry journal article supplement (doi:10.1039/c9me00003h), 2019-01-01
Supplement: c9me00003h1.pdf [file c9me00003h1.pdf]

## ESI

### Macrocyclic Host Appended Carbon Nanotubes for Selective Adsorption of Metal Ions: Combined Experimental, DFT and MD Studies

Ashish Kumar Singha Deb, Pooja Sahu, Sk. Musharaf Ali\*

Chemical Engineering Division, Chemical Engineering Group, Bhabha Atomic Research Centre, Mumbai,  
Maharashtra, India 400085

Homi Bhabha National Institute, Mumbai, Maharashtra, India 400094

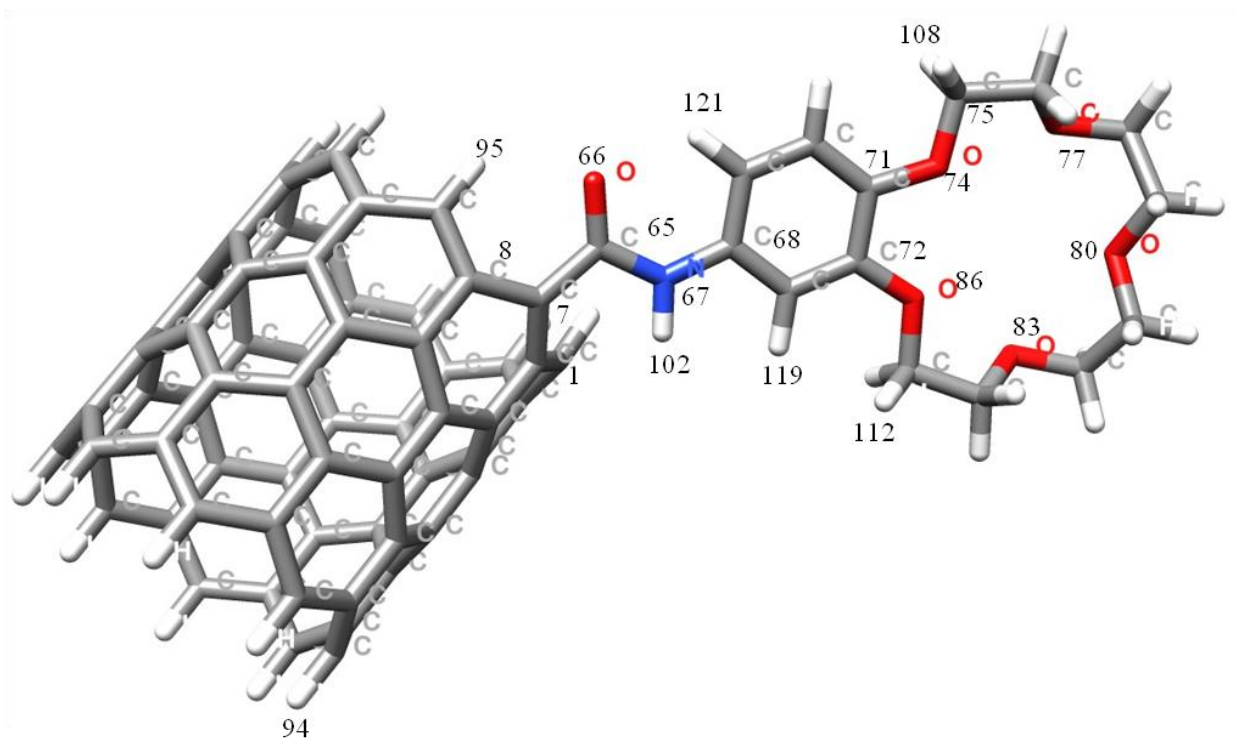

**Fig. S1:** Atoms position of CNT-B15C5 used in MD simulations.

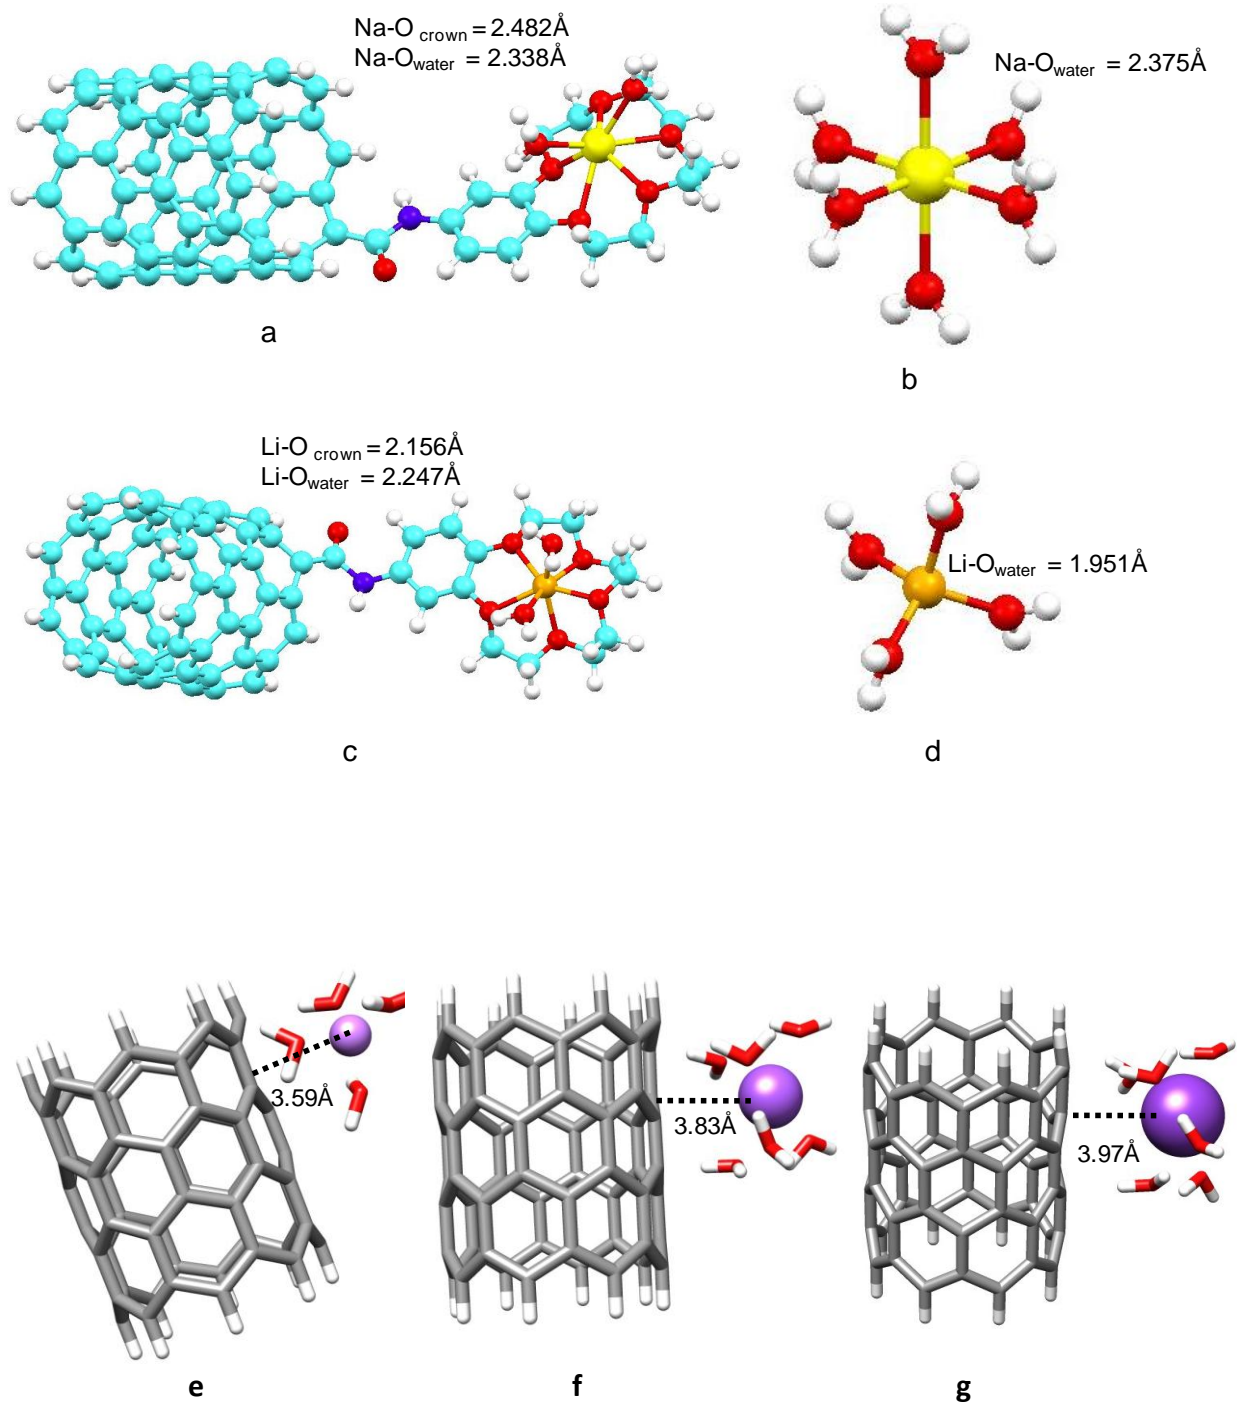

**Fig. S2.** Optimized structures of Na<sup>+</sup> ion with (a) CNT-B15C5 and (b) Water and Li<sup>+</sup> ion with (c) CNT-B15C5 and (d) Water (e) [CNT-Li-(H<sub>2</sub>O)<sub>4</sub>]<sup>+</sup>, (f) [CNT-Na(H<sub>2</sub>O)<sub>6</sub>]<sup>+</sup>, and (g) [CNT-K(H<sub>2</sub>O)<sub>6</sub>]<sup>+</sup>

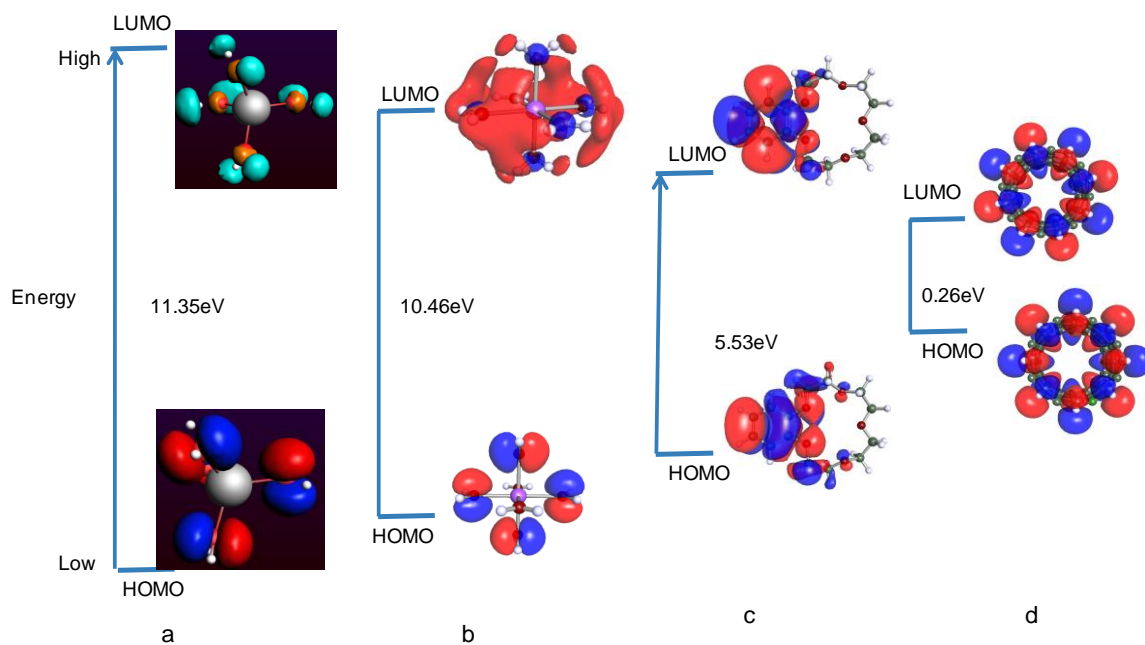

**Fig. S3:** HOMO-LUMO orbitals of (a)  $[\text{Li}-(\text{H}_2\text{O})_4]^+$  (b)  $[\text{Na}-(\text{H}_2\text{O})_6]^+$  (c) B15C5 and (d) CNT(8,0)

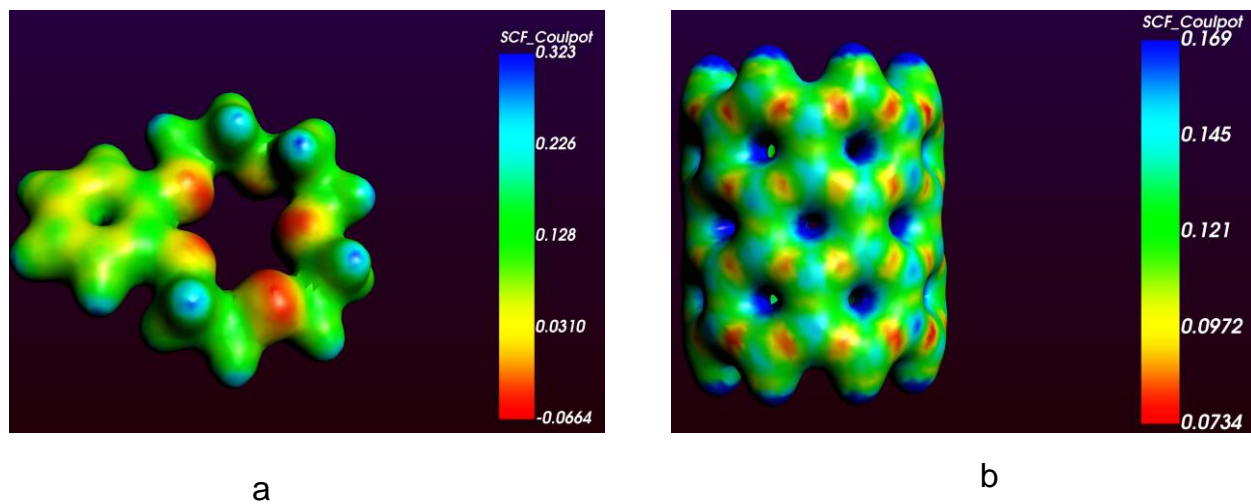

**Fig. S4:** MEP of (a) B15C5 and (b) CNT(8,0)

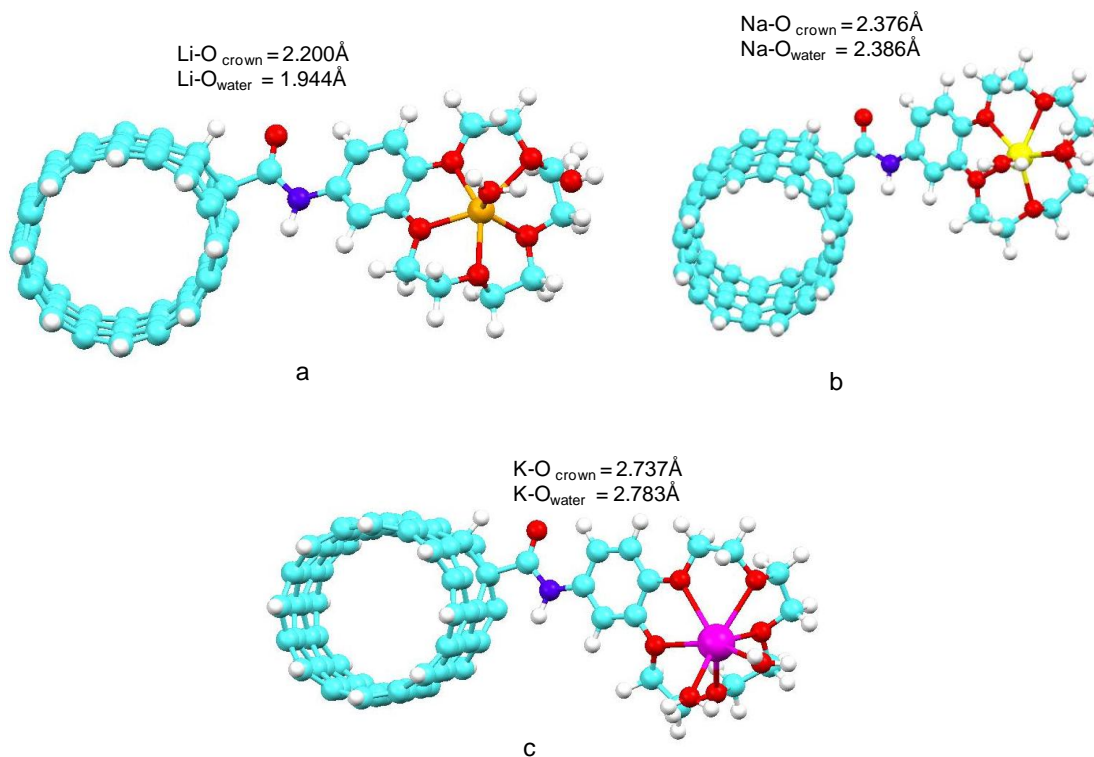

**Fig. S5.** Optimized structures of the (a) functionalized B15C5 at the sidewall of the CNT and its complexes with (b)  $\text{Li}^+$  ion , (c)  $\text{Na}^+$  ion and (d)  $\text{K}^+$  ion

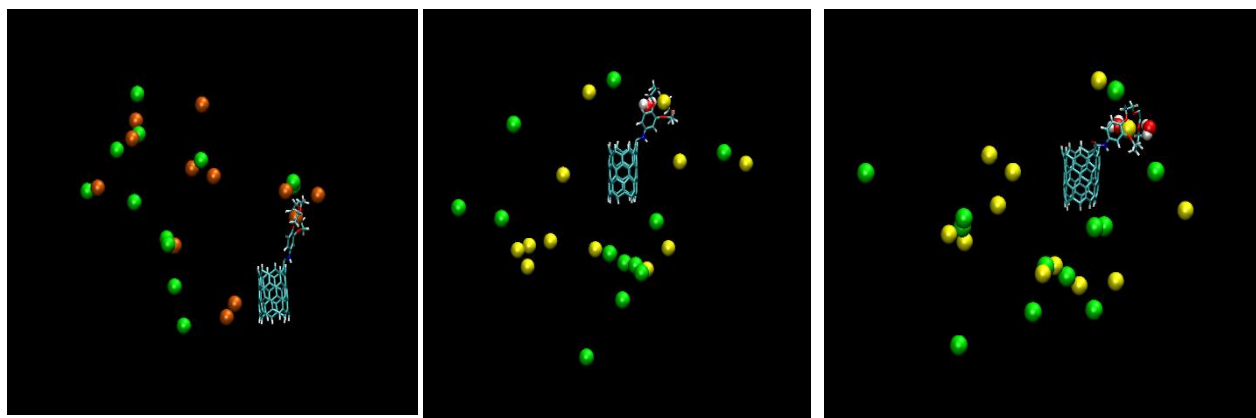

**Fig. S6:** Snapshots of the equilibrated structures of systems containing CNT-B15C5 for pure salt-water systems P1, P2 and P3, with the considered salt KCl, NaCl and LiCl respectively (color code Orange: K; green: Cl; red: O; cyan: C and white: H; yellow: Na and Li) CNT-B15C5 are shown by dynamic bonds. Ions are encapsulated by host B15C5 and hydrated water are shown by red-white.

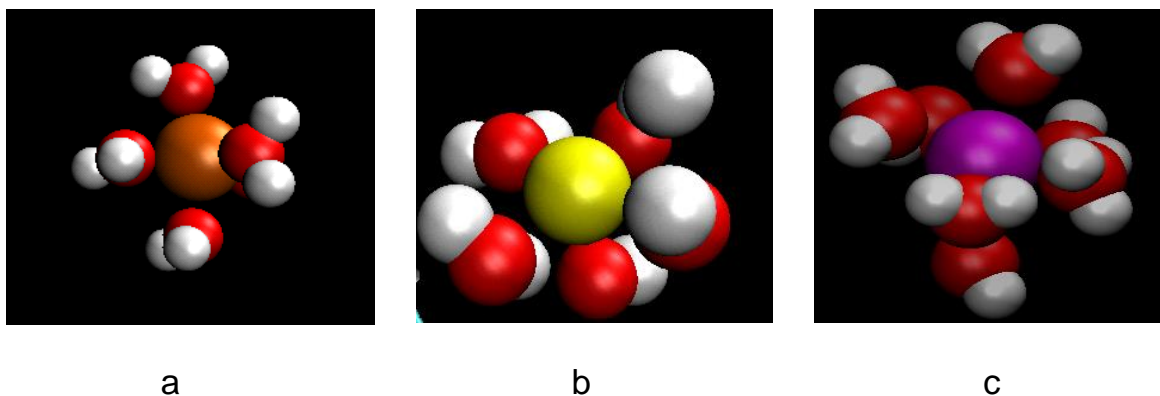

**Fig. S7:** Snap shot of coordinated ion-water for bulk system (a) Li (b) Na and (c) K ion.

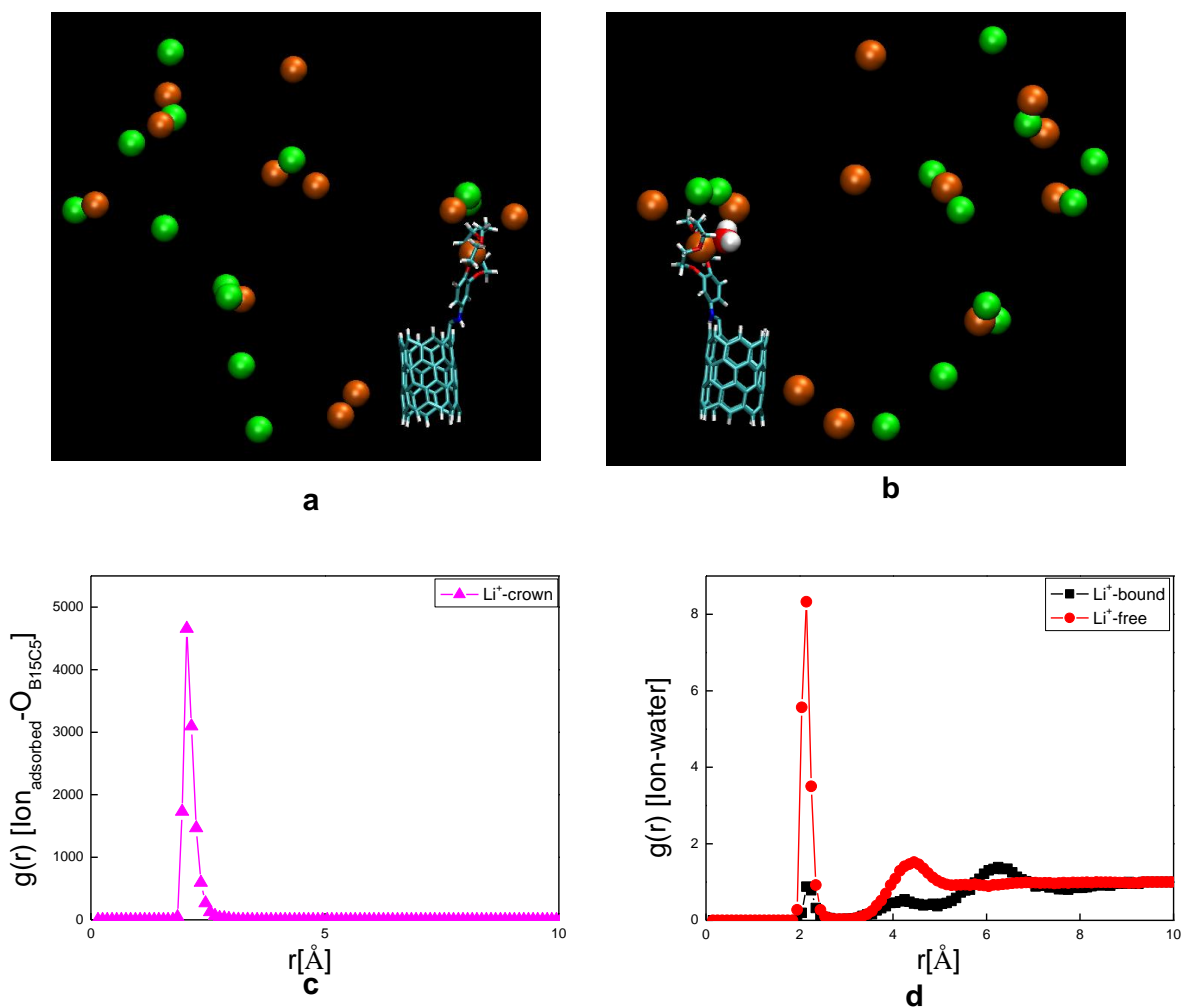

**Fig.S8.** (a) Snap shot of simulated system displaying the capture of Li<sup>+</sup> ion within the cavity of crown ether (b) Snap shot of simulated system displaying the number of water molecules coordinating to Li<sup>+</sup> ion bound to the crown ether cavity. (c) Radial distribution function of crown ether oxygen and Li<sup>+</sup> ion indicating strong interaction (d) water molecules around Li<sup>+</sup> in bulk solutions and in crown ether cavity. Owing to the confinement effect, the water density in the first hydration shell of Li<sup>+</sup> is significantly reduced, and the second hydration shell nearly disappears. Color code: Orange: Li; green: Cl; red: O; cyan: C and white: H.

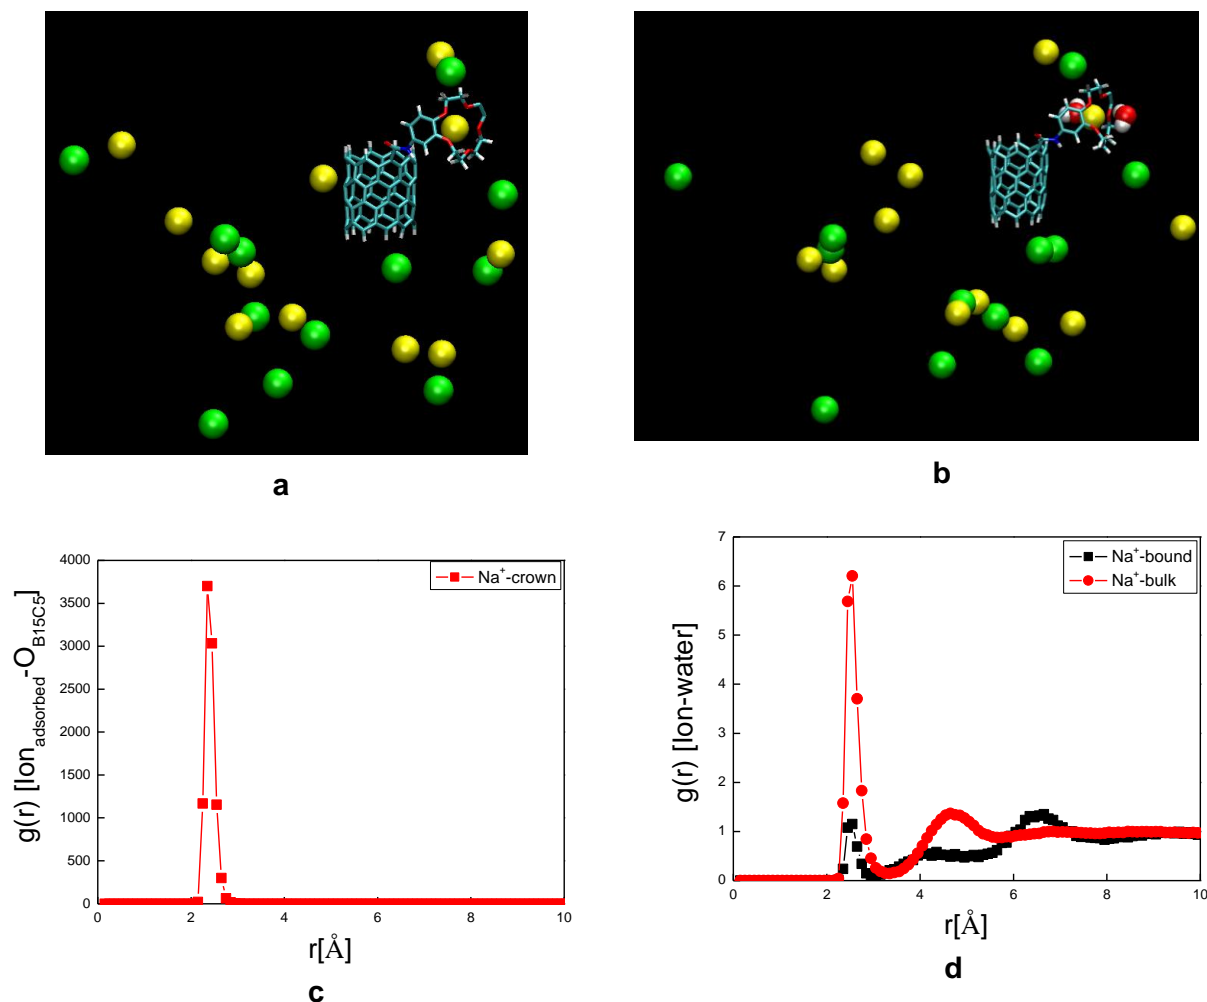

**Fig.S9.** (a) Snap shot of simulated system displaying the capture of  $\text{Na}^+$  ion within the cavity of crown ether (b) Snap shot of simulated system displaying the number of water molecules coordinating to  $\text{Na}^+$  ion bound to the crown ether cavity. (c) Radial distribution function of crown ether oxygen and  $\text{Na}^+$  ion indicating strong interaction(d) water molecules around  $\text{Li}^+$  in bulk solutions and in crown ether cavity. Owing to the confinement effect, the water density in the first hydration shell of  $\text{Na}^+$  is significantly reduced, and the second hydration shell nearly disappears. Color code: Yellow: Li; green: Cl; red: O; cyan: C and white: H.

### S1: Synthesis of designed CNT-B15C5

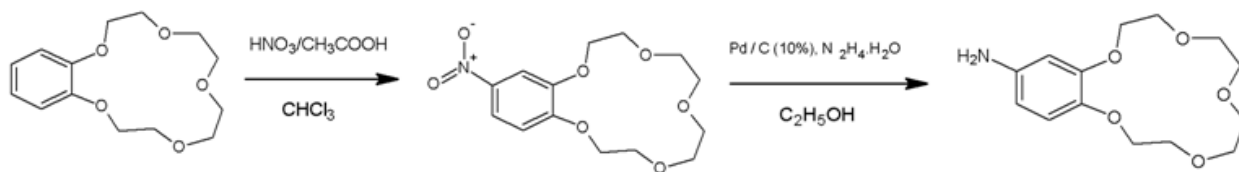

**Fig. S10.** Scheme of synthesis of amino B15C5

#### Synthesis of 4'-aminobenzo-15-crown-5

Synthesis 4'-nitroB15C5 (NB15C5) from B15C5 and then 4'-aminoB15C5 (AB15C5) from 4-nitroB15C5 was carried out by following method (**Fig. S10**) described in literature<sup>S1, S2</sup>. A brief procedure is as follows.

5g of B15C5 was dissolved in mixture of 70ml chloroform and 60ml acetic acid, 17ml of nitric acid (70%) was added drop-wise over a 30 min time period under magnetic stirring. The stirring was continued for next 24 hours at room temperature. The mixture was then neutralized with aqueous Na<sub>2</sub>CO<sub>3</sub> and chloroform layer was separated. The remaining aqueous layer was re-extracted 2-3 times with CHCl<sub>3</sub>. The combined chloroform extracts were dried over MgSO<sub>4</sub> and distilled in vacuum distillation unit at about 50°C a yellow-colored solid crude NB15C5 product was obtained. m.p. 70°C. Yield 75%. IR(KBr): 3090, 2945, 2870, 1587, 1520, 1450, 1338, 1280, 1137, 1090, 1048, 950, 925, 875, 806, 745, 650 cm<sup>-1</sup>. <sup>1</sup>H NMR (500 MHz, TMS): 3.756 (m, 16 –CH<sub>2</sub>-), 6.866-7.911 (m, 3 ArH).

The crude NB15C5 was dissolved in 100ml of boiling ethanol under reflux condition. 0.5 g of Pd/C (10%) was added to the yellow reaction mixture by portions. 25 mL of hydrazine hydrate was added very slowly through the wall of the RBF keeping mind the effervescences getting generated. The mixture was then refluxed for 7 hours and immediately filtered in hot condition through Whatman 541 filter paper. The filtrate was mixed with water and extracted with chloroform. The chloroform layer was dried over MgSO<sub>4</sub> and distilled to get brown color oil of AB15C5 which solidified upon standing. Yield 65%. IR (KBr): 3336, 3220, 2876, 2361, 1617, 1510, 1457, 1350, 1300, 1225, 1123, 1190, 943, 980, 847, 650 cm<sup>-1</sup>. <sup>1</sup>H NMR (500 MHz, TMS): 3.451 (m, 16 –CH<sub>2</sub>-), 5.340 (s, broad, 2H, NH<sub>2</sub>), 6.193-6.264 (ds, 1H, H<sub>b</sub>), 6.706-6.726 9dd, 1H, H<sub>c</sub>), 7.266 (s, 1H, H<sub>a</sub>). FTIR and <sup>1</sup>H NMR spectra of B15C5, NB15C5, and AB15C5 are shown in **Fig. S13** and **Fig. S14**.

#### Carboxylation of CNTs

Carboxylation on the MWCNTs was carried out by already known process (**Fig.S11**) of oxidation<sup>S3</sup> with 3:1 ratio of H<sub>2</sub>SO<sub>4</sub> and HNO<sub>3</sub>. A brief process is described below.

500mg of MWCNTs was mixed in 200ml mixture of H<sub>2</sub>SO<sub>4</sub> and HNO<sub>3</sub> in 3:1 (v/v) ratio, sonicated for 10 min and kept for stirring for about 4 hours at 85°C. The black viscous suspension diluted with de-ionized water and filtered through 0.2µm PTFE membrane in a vacuum filtration assembly. The solid was then washed several times with de-ionized water till the pH of the filtrate reach the pH of the de-ionized water being used and then dried at 80°C under reduced pressure.

### Coupling of Aminobenzo-15-Crown-5 Ether and MWCNT-COOH

A simple process (Fig.S12) of preparing B15C5 functionalized MWCNTs described by Camerena et. al<sup>S4</sup> was followed. 100mg of MWCNT-COOH was sonicated with 100ml of DMF for 10 minutes. The black suspension was then stirred with a magnetic stirrer at room temperature. 260mg of DCC amidation coupling agent was added into the mixture followed 15mg of DMAP. After 10 minutes of stirring, AB15C5 was added to the reaction mixture and the mixture was stirred for next 24 hours at room temperature. The product was filtered using 0.2 $\mu$ m PTFE membrane and the residue was washed with DMF and methanol, and then dried at 50 $^{\circ}$ C under reduced pressure.

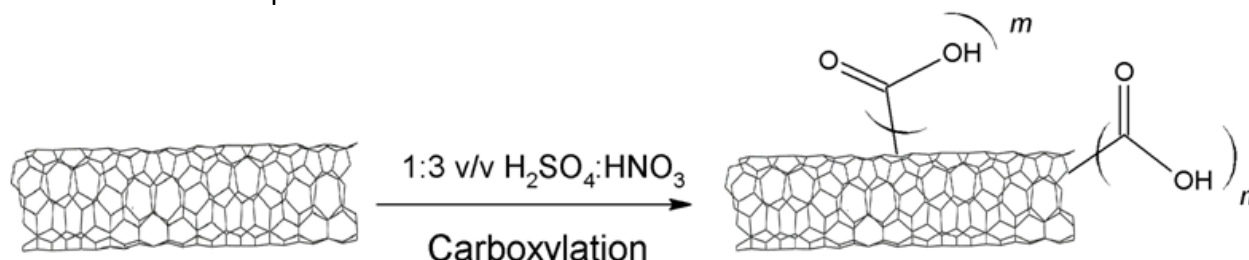

Fig. S11. Preparation of carboxyl MWCNTs

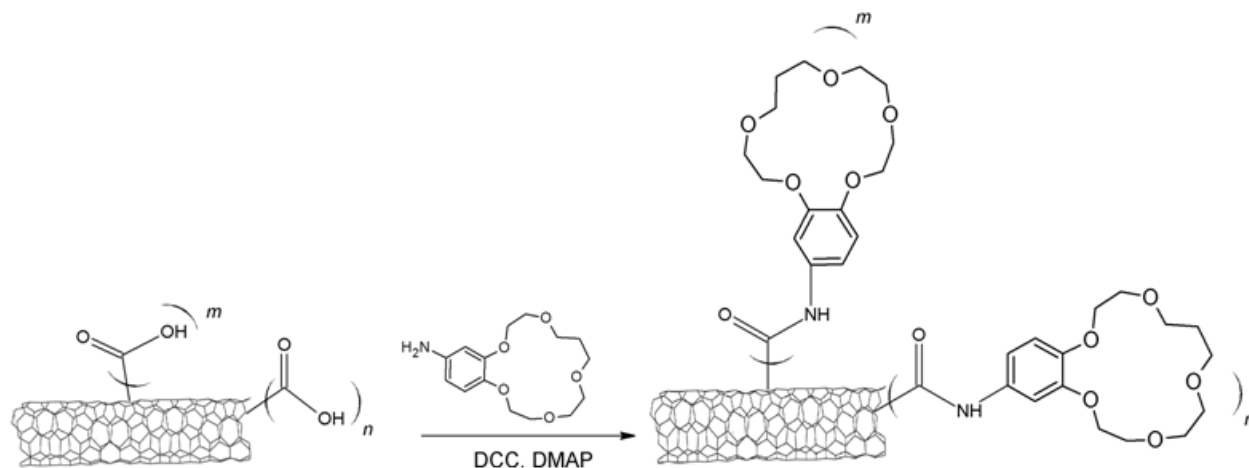

Fig. S12. Preparation of CNT-B15C

### Extraction procedures

#### Solvent extraction of Li<sup>+</sup>, Na<sup>+</sup> and K<sup>+</sup> ions by B15C5 in NB

5ml of metal nitrate solution and 5 ml of B15C5 solution in NB were mixed in 20 ml sealed glass bottle. The bottle was kept for stirring with magnetic capsule at 350rpm for 3 hours at room temperature. The mixture was left overnight undisturbed so that the two layers separate. Then upper part of the solution was then centrifuged and the clear supernatant solution was analyzed for alkali metals using Flame Atomic Absorption Spectrometer (FAAS, Make-GBC, Model-Avanta). The distribution coefficient values were calculated from the ratio of concentration of metal ion in organic solution and aqueous phase.

### Adsorption of metal ions by CNTs and CNT-B15C5

5ml of metal nitrate solution was placed in a fresh and clean glass bottle. 10mg of adsorbent (CNT or CNT-B15C5) were added into it and sonicated for 10 minutes. Then magnetic stirrer was placed in the glass bottle and the mixture was kept for stirring for 3 hours. The mixture was left overnight undisturbed so that the CNTs get settle down. Then clear supernatant solution was analyzed for  $\text{Li}^+$ ,  $\text{Na}^+$  and  $\text{K}^+$  ions using FAAS. The distribution coefficient ( $K_d$ ) and equilibrium adsorption capacity ( $q_e$ ) of an adsorbent were determined from the following relations:

$$K_d = \frac{C_o - C_e}{C_e} \times \frac{V}{m} \text{ (mL g}^{-1}\text{)} \quad (1)$$

$$q_e = (C_o - C_e) \times \frac{V}{m} \text{ (mg g}^{-1}\text{)} \quad (2)$$

where  $C_o$ , and  $C_e$  are the initial and equilibrium analyte concentration (ppm) respectively,  $V$  is the volume of the solution (mL or L) and  $m$  is the mass of adsorbent (g).

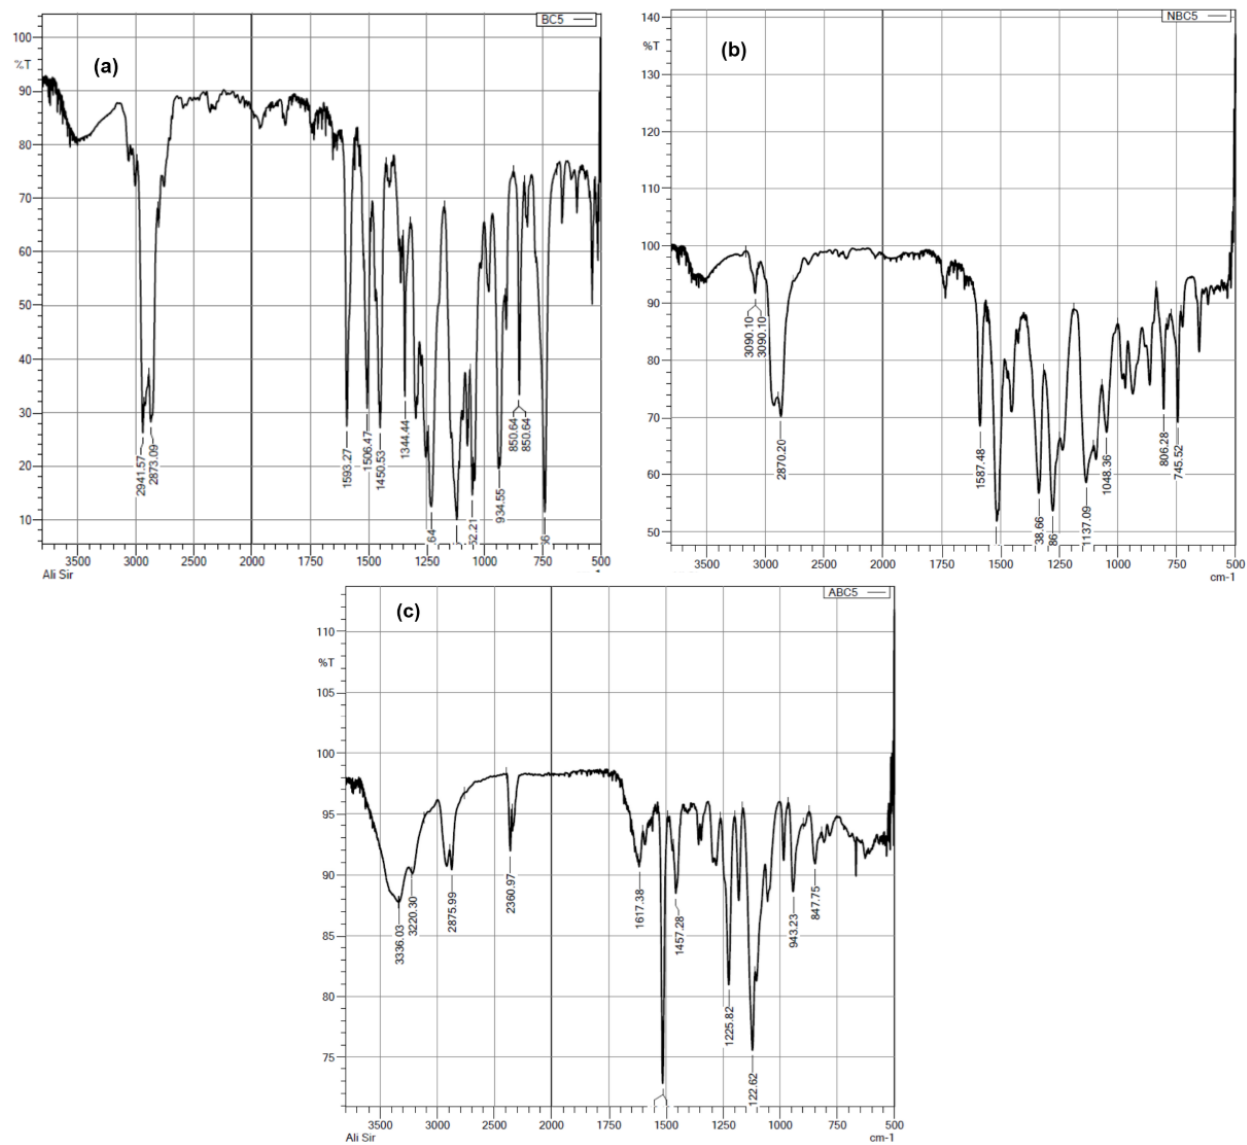

**Fig. S13.** FTIR spectra of (a) B15C5, (b) NB15C5, and (c) AB15C5

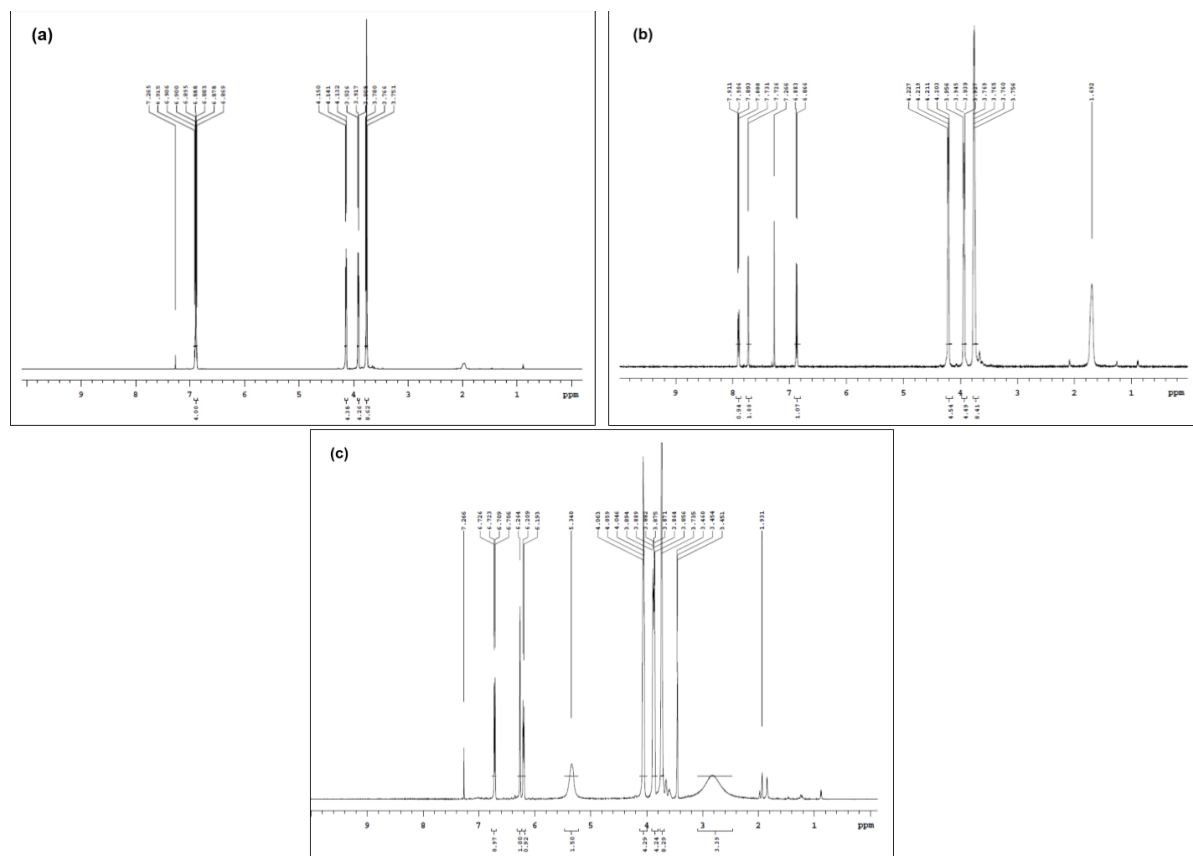

**Fig. S14.**  $^1\text{H}$  NMR spectra of (a) B15C5, (b) NB15C5, and (c) AB15C5

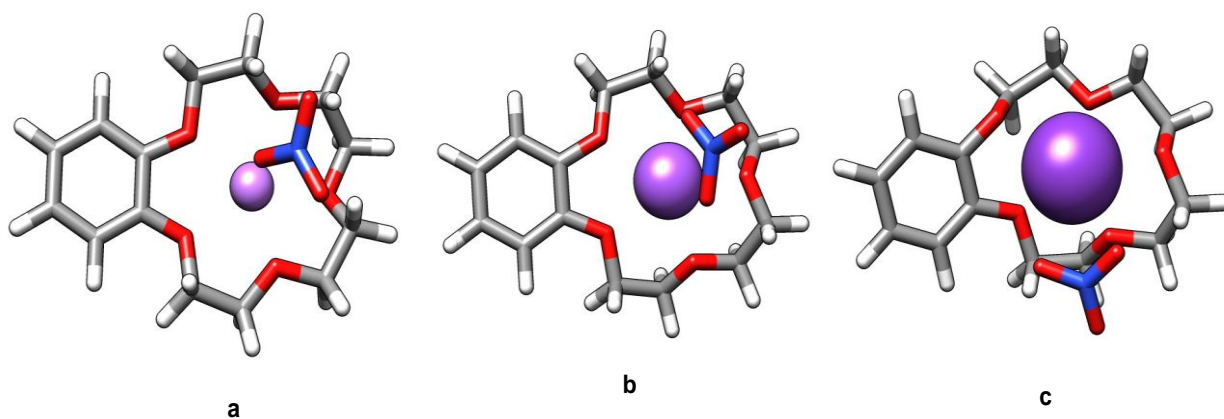

**Fig. S15.** Optimized structures of the complexes of metal ion with B15C5 in the presence of nitrate anion (a) Li (b) Na and (c) K.

**Table S1:** Bonded Forcefield Parameters<sup>S5-S8</sup>

| Molecules | Bonds(i-j)    | $K_r$ (kJmol <sup>-1</sup> nm <sup>-1</sup> )       | $r_{eq}$ (nm)          |
|-----------|---------------|-----------------------------------------------------|------------------------|
| CNT-B15C5 | CC-CC         | 392459.2                                            | 0.140                  |
|           | CC-CA         | 374049.6                                            | 0.149                  |
|           | CB-CB         | 392459.2                                            | 0.141                  |
|           | CE-CE         | 224262.4                                            | 0.152                  |
|           | CC-HC         | 307105.6                                            | 0.108                  |
|           | CB-HB         | 307105.6                                            | 0.110                  |
|           | CE-HE         | 284512.0                                            | 0.111                  |
|           | CA-OA         | 476976.0                                            | 0.122                  |
|           | CA-NA         | 410032.0                                            | 0.133                  |
|           | CB-NA         | 364844.8                                            | 0.134                  |
|           | CB-OE         | 376560.0                                            | 0.136                  |
|           | CE-OE         | 267776.0                                            | 0.142                  |
|           | NA-HA         | 363171.2                                            | 0.101                  |
| Molecules | Angles(i-j-k) | $K_\theta$ (kJmol <sup>-1</sup> rad <sup>-2</sup> ) | $\theta_{eq}$ (degree) |
| CNT-B15C5 | CC-CC-HC      | 292.88                                              | 120.0                  |
|           | CC-CC-CC      | 527.18                                              | 120.0                  |
|           | CC-CC-CA      | 711.28                                              | 120.0                  |
|           | CC-CA-NA      | 588.76                                              | 115.5                  |
|           | CC-CA-OA      | 669.44                                              | 120.0                  |
|           | NA-CA-OA      | 669.44                                              | 122.9                  |
|           | CA-NA-HA      | 292.88                                              | 119.8                  |
|           | CA-NA-CB      | 418.4                                               | 121.9                  |
|           | NA-CB-CB      | 585.76                                              | 120.1                  |
|           | CB-CB-OE      | 585.76                                              | 120.0                  |
|           | CB-OE-CE      | 502.80                                              | 114.75                 |
|           | OE-CE-HE      | 292.88                                              | 109.5                  |
|           | OE-CE-CE      | 418.40                                              | 109.5                  |
|           | CE-CE-HE      | 313.80                                              | 110.70                 |
|           | HE-CE-HE      | 276.14                                              | 107.8                  |

**Table S2.**Non bonded forcefield parameters

| Molecules | site | $\sigma$ (nm) | $\epsilon$ (kJ/mol) |
|-----------|------|---------------|---------------------|
| CNT-B15C5 | CC   | 0.355         | 0.292               |
|           | CA   | 0.375         | 0.439               |
|           | CB   | 0.355         | 0.292               |
|           | CE   | 0.350         | 0.276               |
|           | N    | 0.350         | 0.2761              |
|           | OA   | 0.325         | 0.711               |
|           | OE   | 0.290         | 0.585               |
|           | HC   | 0.242         | 0.125               |
|           | HB   | 0.242         | 0.125               |
|           | HE   | 0.250         | 0.125               |

**Table S3.**Non bonded forcefield parameters for ions

| Species | charge | $\sigma$ (nm) | $\epsilon$ (kJ/mol) |
|---------|--------|---------------|---------------------|
| Li      | 1      | 0.212         | 0.764               |
| Na      | 1      | 0.333         | 0.115               |
| K       | 1      | 0.493         | 0.147               |
| Cl      | -1     | 0.441         | 0.492               |

**Table S4.** Compositions of MD simulation systems: Box size and number of solvent molecules for pure liquid.

| System | CNT-B15C5 | Na <sup>+</sup> | K <sup>+</sup> | Li <sup>+</sup> | Cl <sup>-</sup> | H <sub>2</sub> O | Boxsize [ÅxÅxÅ]    |
|--------|-----------|-----------------|----------------|-----------------|-----------------|------------------|--------------------|
| P1     | 1         | 12              |                |                 | 12              | 2215             | 45.4 x 45.4 x 45.4 |
| P2     | 1         |                 | 12             |                 | 12              | 2215             | 45.4 x 45.4 x 45.4 |
| P3     | 1         |                 |                | 12              | 12              | 2215             | 45.4 x 45.4 x 45.4 |
| P123   | 1         | 4               | 4              | 4               | 12              | 2215             | 45.4 x 45.4 x 45.4 |

**Table. S5.** Molecular descriptors (eV) in aqueous phase.

| Complex                                           | E <sub>HUMO</sub> | E <sub>LUMO</sub> | E <sub>LUMO-HOMO</sub> | χ        | η        | ΔN    |       |       |
|---------------------------------------------------|-------------------|-------------------|------------------------|----------|----------|-------|-------|-------|
| [Li(H <sub>2</sub> O) <sub>4</sub> ] <sup>+</sup> | -11.39            | -0.04             | 11.35                  | 5.7<br>1 | 5.6<br>7 | Li    | Na    | K     |
| [Na(H <sub>2</sub> O) <sub>6</sub> ] <sup>+</sup> | -10.84            | -0.37             | 10.46                  | 5.6<br>1 | 5.2<br>3 |       |       |       |
| [K(H <sub>2</sub> O) <sub>6</sub> ] <sup>+</sup>  | -11.04            | -0.52             | 10.52                  | 5.7<br>8 | 5.2<br>6 |       |       |       |
| CNTB15C5                                          | -4.87             | -3.23             | 1.63                   | 4.0<br>5 | 0.8<br>1 | 0.128 | 0.129 | 0.142 |

**Table S6:** Calculated values of free energy of complexation (kcal/mol) in the solution phase for open and sidewall functionalized CNT.

| Chemical reaction                                                                                                                              | ΔG     |        |
|------------------------------------------------------------------------------------------------------------------------------------------------|--------|--------|
|                                                                                                                                                | Open   | Side   |
| [Li(H <sub>2</sub> O) <sub>4</sub> ] <sup>+</sup> + CNTB15C5 = [CNTB15C5-Li-(H <sub>2</sub> O) <sub>2</sub> ] <sup>+</sup> + 2H <sub>2</sub> O | -7.12  | -16.95 |
| [Na(H <sub>2</sub> O) <sub>6</sub> ] <sup>+</sup> + CNTB15C5 = [CNTB15C5-Na-(H <sub>2</sub> O) <sub>2</sub> ] <sup>+</sup> + 4H <sub>2</sub> O | -33.58 | -26.5  |
| [K(H <sub>2</sub> O) <sub>6</sub> ] <sup>+</sup> + CNTB15C5 = [CNTB15C5-K-(H <sub>2</sub> O) <sub>2</sub> ] <sup>+</sup> + 4H <sub>2</sub> O   | -42.15 | -39.7  |

**Table S7.** Characteristic IR vibrations of MWCNT-COOH and MWCNT-B15C5.

| IR Peaks (cm <sup>-1</sup> ) | Interpretations                                  |
|------------------------------|--------------------------------------------------|
| <b>MWCNT-COOH</b>            |                                                  |
| 3390                         | O-H stretching of COOH                           |
| 2360, 2339                   | C-H stretching of CNT                            |
| 1740 - 1680                  | C=O stretching of COOH                           |
| 1560-1400                    | Skeletal vibrations, representing C=C stretching |
| 1277, 1170, 1062             | C-H bending, in-plane                            |
| 887, 847                     | Aromatic C-H bending, out-of-plane               |
| <b>MWCNT-B15C5</b>           |                                                  |
| 3448, 3420                   | N-H stretching of amide                          |
| 2360, 2332                   | C-H stretching of CNT                            |
| 1740 - 1680                  | C=O stretching of amide (C=ONH)                  |
| 1560-1400                    | Skeletal vibrations, representing C=C stretching |
| 1284, 1230, 1210             | C-H bending                                      |
| 1176, 1140                   | C-O-C stretching of crown ether                  |
| 955                          | C-H bending of -CH2-                             |
| 890                          | Aromatic C-H bending                             |

**Table S8.** Experimental values of  $K_d$  for  $\text{Li}^+$ ,  $\text{Na}^+$  and  $\text{K}^+$  ions with CNT and CNT-B15C5 in aqueous solution.

| Type of CNT-ion complex                                    | $K_d$ (L/g) |
|------------------------------------------------------------|-------------|
| $\text{Li}^+ + \text{CNT} = [\text{CNT-Li}]^+$             | 2.6         |
| $\text{Na}^+ + \text{CNT} = [\text{CNT-Na}]^+$             | 1.1         |
| $\text{K}^+ + \text{CNT} = [\text{CNT-K}]^+$               | 0.9         |
| $\text{Li}^+ + \text{CNT-B15C5} = [\text{CNT-B15C5-Li}]^+$ | ~*          |
| $\text{Na}^+ + \text{CNT-B15C5} = [\text{CNT-B15C5-Na}]^+$ | 23          |
| $\text{K}^+ + \text{CNT-B15C5} = [\text{CNT-B15C5-K}]^+$   | 68.4        |

\*below detection

**Table S9:** Calculated values of free energy of complexation (kcal/mol) of metal ion in presence of nitrate ion with B15C5 and CNT-B15C5 in the solution phase (for B15C5, nitrobenzene was taken as solvent phase).

| Complexation reaction                                                                                                                                                               | Solution phase |
|-------------------------------------------------------------------------------------------------------------------------------------------------------------------------------------|----------------|
| CNT                                                                                                                                                                                 |                |
| $\text{Li}^+(\text{H}_2\text{O})_4 + \text{CNT} + \text{NO}_3^- = \text{CNTLiNO}_3 + 4\text{H}_2\text{O}$                                                                           | 15.7           |
| $\text{Na}^+(\text{H}_2\text{O})_6 + \text{CNT} + \text{NO}_3^- = \text{CNTNaNO}_3 + 6\text{H}_2\text{O}$                                                                           | -24.4          |
| $\text{K}^+(\text{H}_2\text{O})_6 + \text{CNT} + \text{NO}_3^- = \text{CNTKNO}_3 + 6\text{H}_2\text{O}$                                                                             | -28.2          |
| B15C5                                                                                                                                                                               |                |
| $\text{Li}^+(\text{H}_2\text{O})_{4(\text{aq})} + \text{B15C5}_{(\text{org})} + \text{NO}_3^-_{(\text{aq})} = \text{B15C5LiNO}_{3(\text{org})} + 4\text{H}_2\text{O}_{(\text{aq})}$ | -21.0          |
| $\text{Na}^+(\text{H}_2\text{O})_{6(\text{aq})} + \text{B15C5}_{(\text{org})} + \text{NO}_3^-_{(\text{aq})} = \text{B15C5NaNO}_{3(\text{org})} + 6\text{H}_2\text{O}_{(\text{aq})}$ | -36.5          |
| $\text{K}^+(\text{H}_2\text{O})_{6(\text{aq})} + \text{B15C5}_{(\text{org})} + \text{NO}_3^-_{(\text{aq})} = \text{B15C5KNO}_{3(\text{org})} + 6\text{H}_2\text{O}_{(\text{aq})}$   | -47.1          |
| CNT-B15C5                                                                                                                                                                           |                |
| $\text{Li}^+(\text{H}_2\text{O})_4 + \text{CNTB15C5} + \text{NO}_3^- = \text{CNTB15C5LiNO}_3 + 4\text{H}_2\text{O}$                                                                 | -22.5          |
| $\text{Na}^+(\text{H}_2\text{O})_6 + \text{CNTB15C5} + \text{NO}_3^- = \text{CNTB15C5NaNO}_3 + 6\text{H}_2\text{O}$                                                                 | -35.8          |
| $\text{K}^+(\text{H}_2\text{O})_6 + \text{CNTB15C5} + \text{NO}_3^- = \text{CNTB15C5KNO}_3 + 6\text{H}_2\text{O}$                                                                   | -38.1          |

**S1.** Ungaro, R.; El Haj , B. ; Smid, J. Substituent Effects on the stability of Cations Complexes of 4'-Substituted Mono-benzo Crown Ethers. J. Am. Chem. Soc. 1975, 98, 5198-5199.

**S2.** Shchori, E. ; Jagur-Grodzinski, J.; Shporer, J. Kinetics of Complexation of Macro cyclic Polyether with Sodium ions by NMR spectroscopy. II. Solvent Effects (1973), Contribution from Weizmann Institute of Science, Israel. J. Am. Chem. Soc. 1973, 95, 3842-3843.

**S3.** Zhang, J.; Zou, H.; Qing, Q.; Yang, Y.; Li, Q.; Liu, Z.; Guo, X.; Du, Z. Effect of Chemical Oxidation on the Structure of Single-Walled Carbon Nanotubes, J. Phys. Chem. B 2003, 107, 3712-3718.

**S4.** Camerena, J.P. ; Espinoza-Gomez, H.; Somanathan, R.; Tiznado, H.; Romero-Rivera, R. Molecular Assembly of MW-CNTs with amino Crown Ether: Synthesis and Characterization. J. Nanosci. Nanotechnol 2011, 11, 5539-5545.

**S5.** Frolov, A.I.; Kirchner, K.; Kirchner, T.; Fedorov, M.V. Molecular-scale insights into the mechanisms of ionic liquids interactions with carbon nanotubes, Faraday Discuss., 2012,154, 235-247;

- S6.** Frolov, A.I.; Rozhin, A.G.; Fedorov, M.V. Ion interactions with the carbon nanotube surface in aqueous solutions: Understanding the molecular mechanisms, *Chem Phys Chem* 2010, 11, 2612 – 2616.
- S7.** Sahu, P.; Ali, Sk. M., Shenoy, K.T. Thermodynamics of fluid conduction through hydrophobic channel of carbon nanotubes: The exciting force for filling of nanotubes with polar and nonpolar fluids, *J. Chem. Phys.* 2015, 142, 074501.
- S8.** Sahu, P.; Ali, Sk. M., Shenoy, K.T. Test of Universal Scaling Law for Molecular Diffusion of Liquids in Bulk and Nanotube Confinement, *J. Phys. Chem. C*, 2017, 121, 11968–11974.
